# Supplementary material for: Self-assembled oligonucleotide-polyester dendrimers
Source: Royal Society of Chemistry journal article supplement (doi:10.1039/b209029e), 2002-01-01
Supplement: b209029e.doc [file b209029e.doc]

Self-assembled oligonucleotide-polyester dendrimers

Sarah L. Goh, Matthew B. Francis, and Jean M. J. Fréchet*

Department of Chemistry, University of California, Berkeley, CA 94720-1460 USA and

Materials Science Division, E. O. Lawrence Berkeley National Laboratories, Berkeley, CA 94720 USA.

Fax: 510 643 3079; Tel: 510 643 3077; http://www.frechet.com/; E-mail: frechet@cchem.berkeley.edu.

SUPPLEMENTAL INFORMATION

Oligonucleotides were synthesized with APac, GiPr-Pac, CAc, and T (UltraMILD) phosphoramidites from Glen Research Corporation on an Expedite 8909 DNA synthesizer (Applied Biosystems). Conjugates were made on a 1 μmole scale using 500 Å CPG columns (Glen Research) for **5d** and **6d**,and a 1000 Å column for **7d**. The final trityl deprotection step on the synthesizer was omitted, and the oligonucleotides were left on the solid support. The controlled pore glass (CPG) beads were transferred to a 1.5 mL disposable chromatography column (BioRad) and equipped with a Teflon stopcock. The CPG beads were shaken for 1 min in methanol with 5% DMAP. The excess reagent was removed by vacuum filtration, and the beads were washed twice with methanol, and twice with CH2Cl2. The 5´ 4,4´-dimethoxytrityl (DMT) group was removed by three treatments (0.5 mL, 1 min) with 3% trichloroacetic acid (TCA) in CH2Cl2, followed by exhaustive washing with CH2Cl2 to remove any residual acid, yielding the support bound, native unlabeled strand, **5a-7a**. Esterification of the 5´ alcohol was accomplished with **4** (223 mg, 0.5 mmol) in the presence of 4-dimethylaminopyridine (DMAP) (61 mg, 0.25mmol) and 1-(3-dimethylaminopropyl)-3-ethylcarbodiimide hydrochloride (EDC) (95 mg, 0.5 mmol) in CH2Cl2 (1 ml) afforded the second-generation conjugate, **5b**-**7b**. After agitating the beads for 2-6 h, excess reagent was removed by filtration, and the beads were washed exhaustively with CH2Cl2. To reveal the alcohol periphery, **5b** was subjected to 1 mL of 10% TCA in ethylene glycol for 2 h. The excess solution was removed by filtration, the beads washed twice with methanol and twice with CH2Cl2. The oligonucleotide-dendron conjugates were cleaved from the solid support by heating for 2 hr in 1:1 morpholine:methanol at 60 °C. The methanol: morpholine mixture was removed under vacuum in a DNA concentrator and the liberated conjugates were taken up in doubly distilled water.

Oligonucleotide conjugates were purified by reverse-phase HPLC using an Agilent 1100 equipped with a diode array detector and a Zorbax Eclipse XBD-C8 column (5 μm, 150 x 4.6 mm).

Matrix assisted laser desorption ionization time-of-flight (MALDI-TOF) data was collected on a PerSeptive Biosystems Voyager-DE instrument in negative ion mode using a matrix of 0.35 M 3-hydroxypicolinic acid and 0.1 M ammonium citrate in a 1:1 mixture of CH3CN and H2O. MALDI spectra of the conjugates are given below. Minor fragmentation peaks corresponding to the loss of an A, C, or G base are observed in the spectra for **5d**, and **6f**.1

The hybridized dendrimer was analyzed on a 15% native polyacrylamide gel. Solutions of the duplexes were 3 M in each strand with 50 mM NaCl. Samples of 150 ng of **7d** and 75 ng of the duplex solutions were loaded onto the gel with a 15% Ficoll (Fluka) loading buffer. The gel was run at 160 V and 4 °C with recirculating 1X TBE buffer for 12 h. The DNA bands were visualized by staining with GelStar (BioWhittiker Molecular Applications).

1 E. Nordhoff, *Trends in Analytical Chemistry* 1996, **15**, 240-250.
